# Supplementary material for: Comparisons of spectral aerosol single scattering albedo in Seoul, South Korea
Source: Copernicus journal article supplement (doi:10.5194/amt-11-2295-2018), 2018-04-23
Supplement: Supplementary file 1 [file amt-11-2295-2018-supplement.zip]

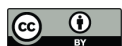

## *Supplement of*

# **Comparisons of spectral aerosol single scattering albedo in Seoul, South Korea**

**Jungbin Mok et al.**

*Correspondence to:* Jungbin Mok (jungbin.mok@nasa.gov)

- amt-11-2295-2018-supplement-title-page.pdf
- AMP\_data\_Archive
  - matchup\_out579.dd415\_yonsei\_sfc\_albedo.txt\_v3\_aotge0.15
  - matchup\_out579.dd440\_yonsei\_sfc\_albedo.txt\_v3\_aotge0.15
  - matchup\_out579.dd500\_yonsei\_sfc\_albedo.txt\_v3\_aotge0.15
  - matchup\_out579.dd615\_yonsei\_sfc\_albedo.txt\_v3\_aotge0.15
  - matchup\_out579.dd673\_yonsei\_sfc\_albedo.txt\_v3\_aotge0.15
  - matchup\_out579.dd870\_yonsei\_sfc\_albedo.txt\_v3\_aotge0.15
  - matchup\_out582.dd305\_yonsei\_sfc\_albedo.txt\_v3\_aotge0.15
  - matchup\_out582.dd311\_yonsei\_sfc\_albedo.txt\_v3\_aotge0.15
  - matchup\_out582.dd325\_yonsei\_sfc\_albedo.txt\_v3\_aotge0.15
  - matchup\_out582.dd332\_yonsei\_sfc\_albedo.txt\_v3\_aotge0.15
  - matchup\_out582.dd340\_yonsei\_sfc\_albedo.txt\_v3\_aotge0.15
  - matchup\_out582.dd380\_yonsei\_sfc\_albedo.txt\_v3\_aotge0.15
  - matchup\_out582.dd440\_yonsei\_sfc\_albedo.txt\_v3\_aotge0.15
  - out579.dd440\_yonsei\_sfc\_albedo.txt
  - out582.dd440\_yonsei\_sfc\_albedo.txt
- skyradiometer\_different\_surface\_albedo
  - skyradio\_yonsei2016\_s00c00\_alb0.04\_v01.00.00.txt
  - skyradio\_yonsei2016\_s00c00\_alb0.10\_v01.00.00.txt
  - skyradio\_yonsei2016\_s00c00\_alb0.20\_v01.00.00.txt

The copyright of individual parts of the supplement might differ from the CC BY 4.0 License.
